# Supplementary material
Source: Springer Nature journal article supplement (https://www.springermedizin.de/resource/supplementary/12937_2010_307_MOESM6_ESM.pdf/25654834)

# Mood Affected By Hunger

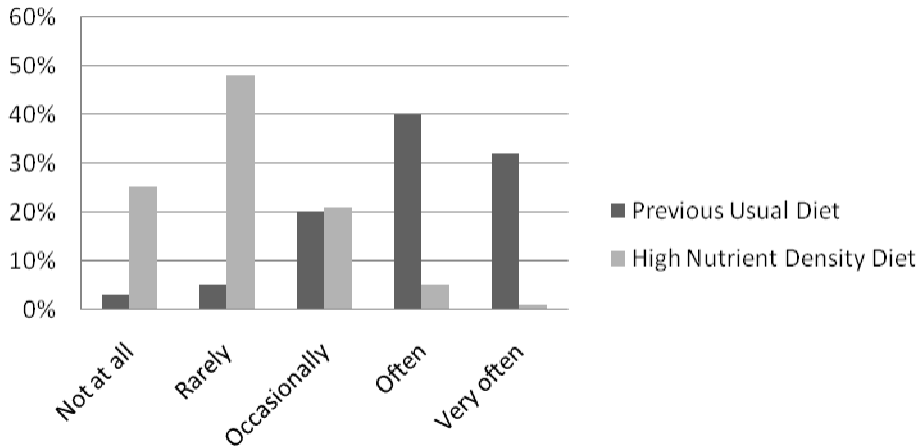

Supplement: MOESM6 [file 25654834]
